# Supplementary material for: Healing Properties of Epidermal Growth Factor and Tocotrienol-Rich Fraction in Deep Partial-Thickness Experimental Burn Wounds
Source: PubMed Central journal article supplement (PMC7070471; doi:10.3390/antiox9020130), 2020-02-03
Supplement: antioxidants-09-00130-s001.pdf [file antioxidants-09-00130-s001.pdf]

## Supplementary files

**Table S1. Description of histological score 0 for the epidermis.**

|                 |                                                                                                                  |                   |            |
|-----------------|------------------------------------------------------------------------------------------------------------------|-------------------|------------|
| Score           | 0                                                                                                                |                   |            |
| Description     | Crust                                                                                                            | Epithelialization | Rete ridge |
|                 | Loosely attached                                                                                                 | No                | No         |
| Image<br>(40×)  | 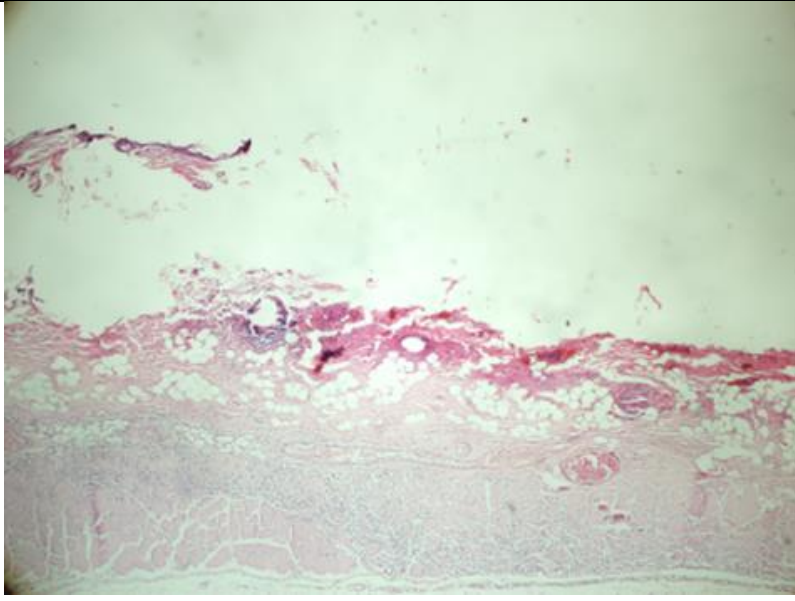                              |                   |            |
| Image<br>(100×) |  <p>Dermis</p> <p>Muscle</p> |                   |            |

**Table S2. Description of histological score 1 for the epidermis**

|                 |                                                                                      |                   |            |
|-----------------|--------------------------------------------------------------------------------------|-------------------|------------|
| Score           | 1                                                                                    |                   |            |
| Description     | Crust                                                                                | Epithelialization | Rete ridge |
|                 | Tightly attached                                                                     | Minimal           | No         |
| Image<br>(40×)  | 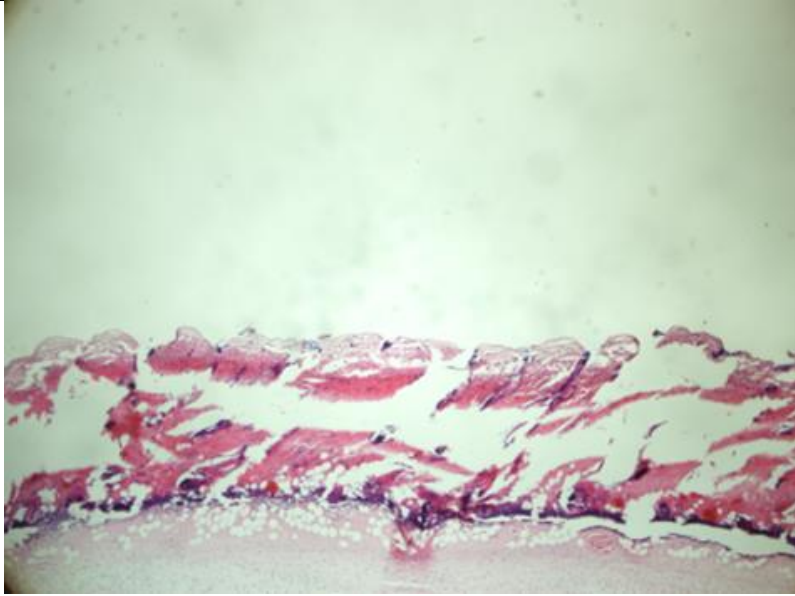  |                   |            |
| Image<br>(100×) |  |                   |            |

**Table S3. Description of histological score 2 for the epidermis**

|                 |                                                                                      |                   |            |
|-----------------|--------------------------------------------------------------------------------------|-------------------|------------|
| Score           | 2                                                                                    |                   |            |
| Description     | Crust                                                                                | Epithelialization | Rete ridge |
|                 | Tightly attached                                                                     | Mild              | No         |
| Image<br>(40×)  | 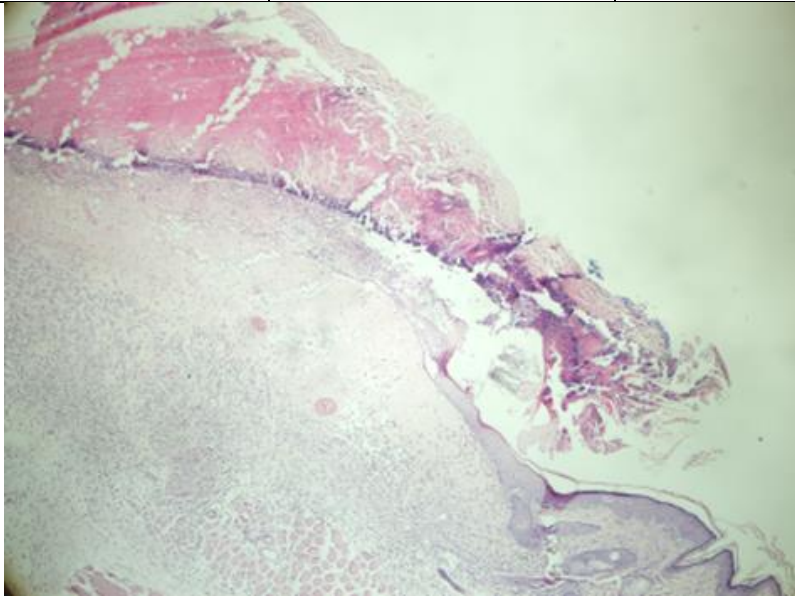  |                   |            |
| Image<br>(100×) |  |                   |            |



**Table S4. Description of histological score 3 for the epidermis**

|                 |                                                                                      |                   |            |
|-----------------|--------------------------------------------------------------------------------------|-------------------|------------|
| Score           | 3                                                                                    |                   |            |
| Description     | Crust                                                                                | Epithelialization | Rete ridge |
|                 | Tightly attached                                                                     | Moderate          | No         |
| Image<br>(40×)  | 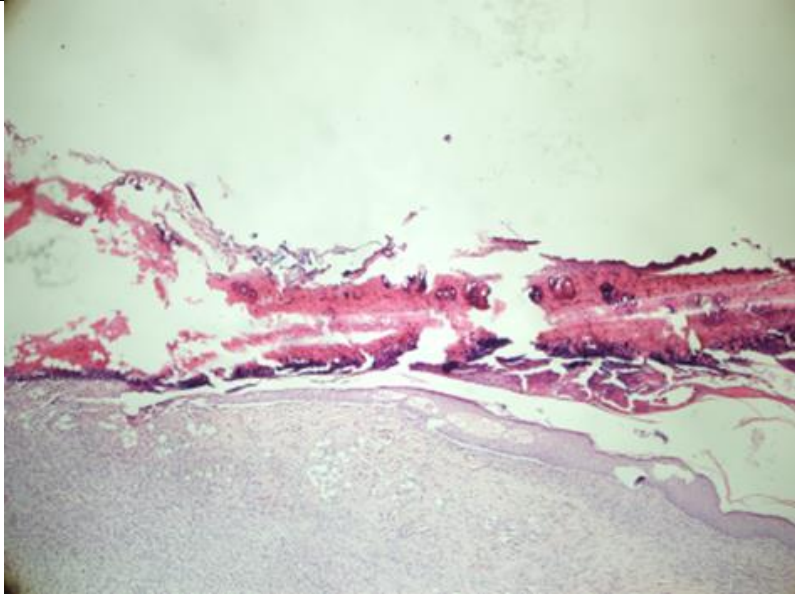  |                   |            |
| Image<br>(100×) |  |                   |            |

**Table S5. Description of histological score 4 for the epidermis**

|                 |                                                                                      |                   |            |
|-----------------|--------------------------------------------------------------------------------------|-------------------|------------|
| Score           | 4                                                                                    |                   |            |
| Description     | Crust                                                                                | Epithelialization | Rete ridge |
|                 | No                                                                                   | Moderate          | No         |
| Image<br>(40×)  | 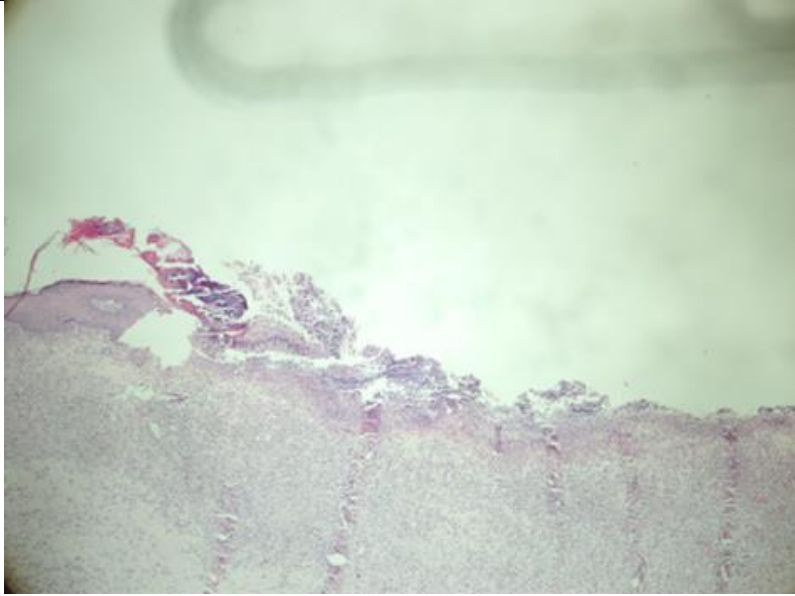  |                   |            |
| Image<br>(100×) |  |                   |            |

**Table S6. Description of histological score 5 for the epidermis**

|                 |                                                                                      |                   |            |
|-----------------|--------------------------------------------------------------------------------------|-------------------|------------|
| Score           | 5                                                                                    |                   |            |
| Description     | Crust                                                                                | Epithelialization | Rete ridge |
|                 | No                                                                                   | Severe            | No         |
| Image<br>(40×)  | 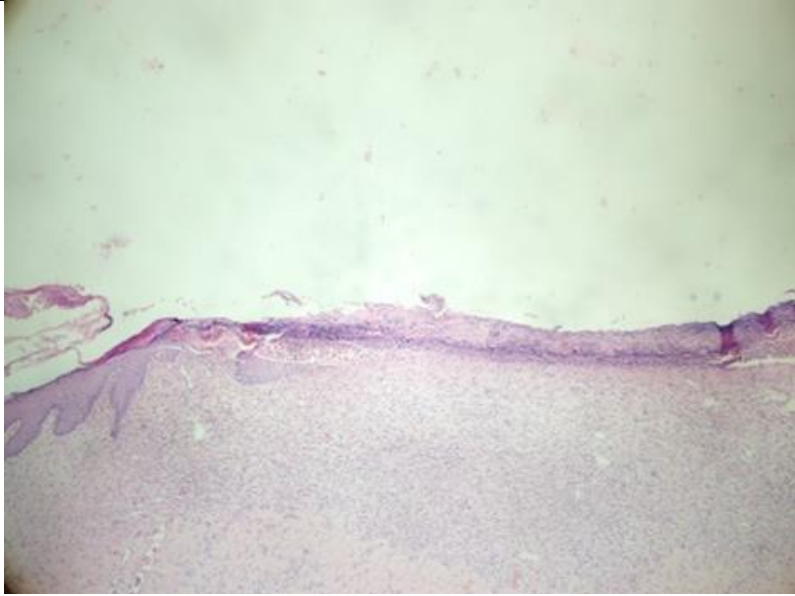  |                   |            |
| Image<br>(100×) |  |                   |            |

**Table S7. Description of histological score 6 for the epidermis**

|                 |                                                                                      |                   |            |
|-----------------|--------------------------------------------------------------------------------------|-------------------|------------|
| Score           | 6                                                                                    |                   |            |
| Description     | Crust                                                                                | Epithelialization | Rete ridge |
|                 | No                                                                                   | Complete          | No         |
| Image<br>(40×)  | 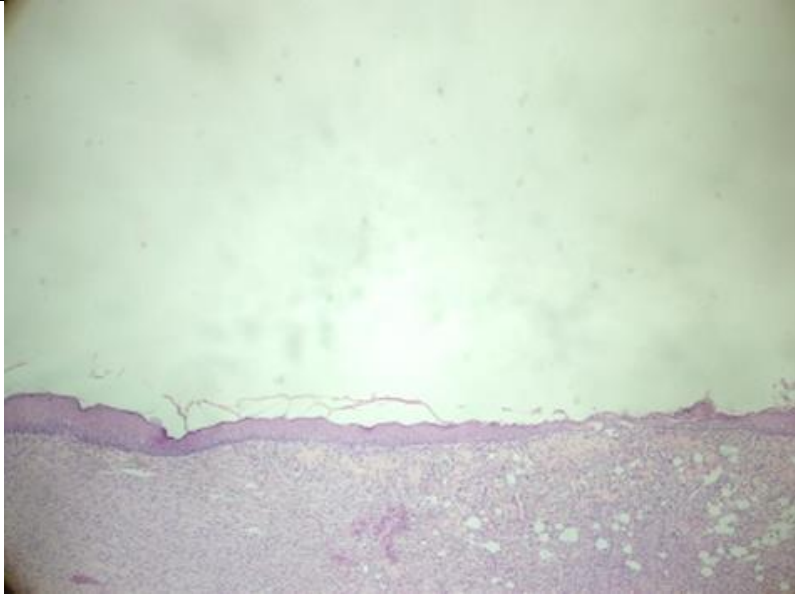  |                   |            |
| Image<br>(100×) |  |                   |            |

**Table S8. Description of histological score 7 for the epidermis**

|                 |                                                                                      |                   |            |
|-----------------|--------------------------------------------------------------------------------------|-------------------|------------|
| Score           | 7                                                                                    |                   |            |
| Description     | Crust                                                                                | Epithelialization | Rete ridge |
|                 | No                                                                                   | Complete          | Yes        |
| Image<br>(40×)  | 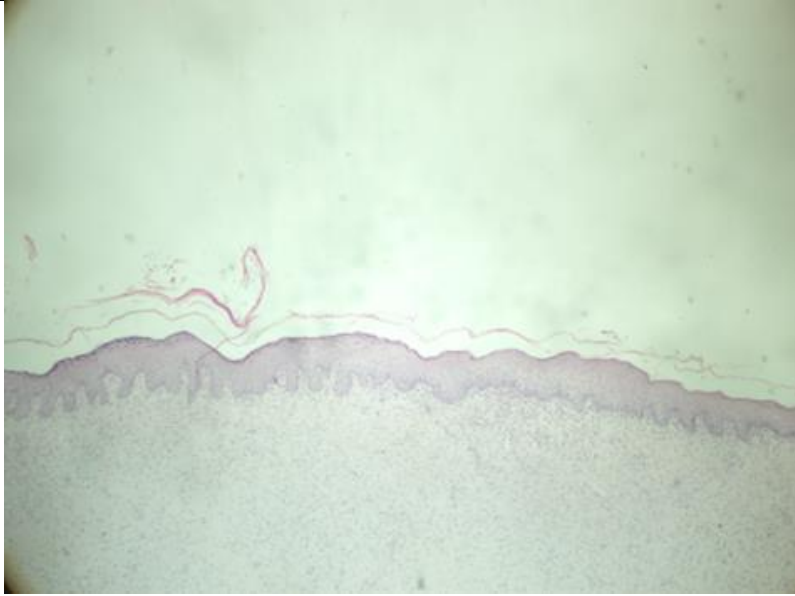  |                   |            |
| Image<br>(100×) |  |                   |            |



### **3.3.2.3.2 Histological score grade for dermis**

According to the proportion of adipose cells, inflammatory cells and fibroblasts, the state of collagen deposition, and the formation of hair follicles, the healing of the dermis was also evaluated with scores ranging from 0 - 7 (Table 3.12 and Table 3.13). The following is a detailed explanation of each score:

0: Many adipose cells; A few inflammatory cells; No fibroblasts; No collagen deposition; No formation of hair follicles.

1: Medium adipose cells; Medium inflammatory cells; A few fibroblasts; No collagen deposition; No formation of hair follicles.

2: A few adipose cells; Medium inflammatory cells; A few fibroblasts; No collagen deposition; No formation of hair follicles.

3: A few adipose cells; Many inflammatory cells; A few fibroblasts; No collagen deposition. No formation of hair follicles.

4: A few adipose cells; Many inflammatory cells; Medium fibroblasts; mild collagen deposition. No formation of hair follicles.

5: No adipose cells; Medium inflammatory cells; Many fibroblasts; Moderate collagen deposition; No formation of hair follicles.

6: No adipose cells; A few inflammatory cells; Many fibroblasts; Moderate collagen deposition. No formation of hair follicles.

7: No adipose cells; A few inflammatory cells; Medium fibroblasts; Severe collagen deposition. The immature hair follicles were observed.

**Table S9 Histological score range for the dermis.**

| score | Adipose cell | Inflammatory cell | Fibroblast | Collagen deposition | Hair follicle |
|-------|--------------|-------------------|------------|---------------------|---------------|
| 0     | +++          | +                 | -          | -                   | -             |
| 1     | ++           | ++                | +          | -                   | -             |
| 2     | +            | ++                | +          | -                   | -             |
| 3     | +            | +++               | +          | -                   | -             |
| 4     | +            | +++               | ++         | +                   | -             |
| 5     | -            | ++                | +++        | ++                  | -             |
| 6     | -            | +                 | +++        | ++                  | -             |
| 7     | -            | +                 | ++         | +++                 | +             |

Note: -: absent +: mild ++: moderate +++: severe

**Table S10. Images of histological score for the dermis.**

| Score | Description                                                         | Image (100x)                                                                                                               |
|-------|---------------------------------------------------------------------|----------------------------------------------------------------------------------------------------------------------------|
| 0     | Many adipose cells; A few inflammatory cells;                       | 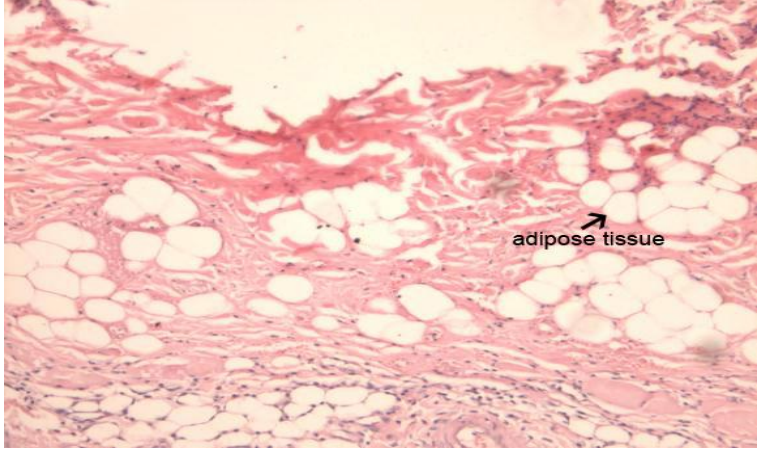 <p>adipose tissue</p>                   |
| 1     | Medium adipose cells; Medium inflammatory cells; A few fibroblasts; |  <p>Inflammatory cells</p>              |
| 2     | A few adipose cells; Medium inflammatory cells; A few fibroblasts;  |  <p>fibroblast</p> <p>blood vessel</p> |

|   |                                                                                                   |                                                                                                                                   |
|---|---------------------------------------------------------------------------------------------------|-----------------------------------------------------------------------------------------------------------------------------------|
| 3 | <p>A few adipose cells; Many inflammatory cells; A few fibroblasts;</p>                           | 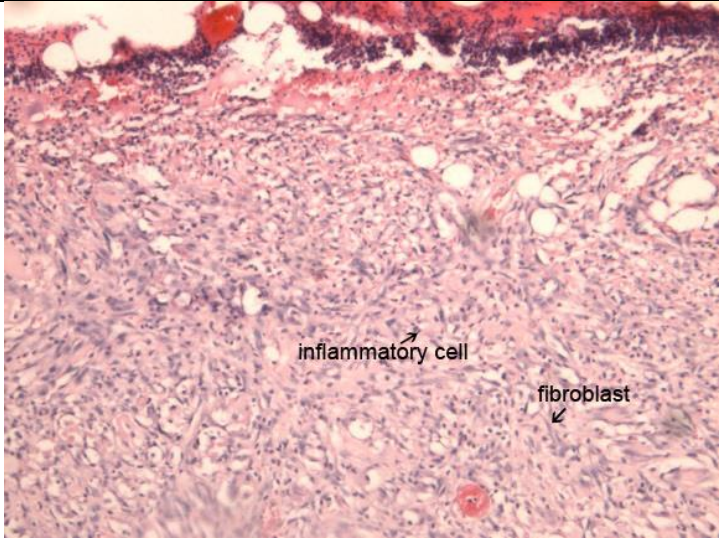 <p>inflammatory cell</p> <p>fibroblast</p>     |
| 4 | <p>A few adipose cells; Many inflammatory cells; Medium fibroblasts; mild collagen deposition</p> |  <p>collagen deposition</p> <p>fibroblast</p>  |
| 5 | <p>Medium inflammatory cells; Many fibroblasts; Moderate collagen deposition;</p>                 |  <p>fibroblast</p> <p>collagen deposition</p> |



|   |                                                                                                                             |                                                                                                                                                                                                                                                                                                                                                                                                                                                                                                                                                 |
|---|-----------------------------------------------------------------------------------------------------------------------------|-------------------------------------------------------------------------------------------------------------------------------------------------------------------------------------------------------------------------------------------------------------------------------------------------------------------------------------------------------------------------------------------------------------------------------------------------------------------------------------------------------------------------------------------------|
| 6 | <p>A few inflammatory cells; Many fibroblasts; Moderate collagen deposition.</p>                                            | 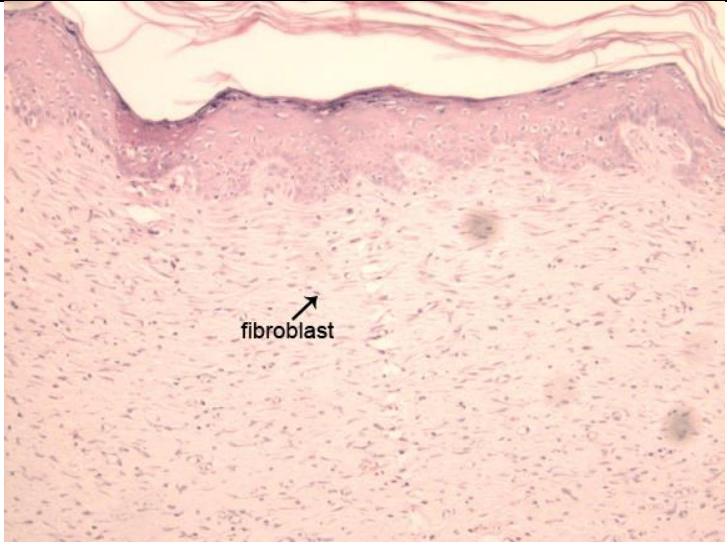 <p>A histological micrograph of skin tissue. The epidermis is visible at the top, showing a wavy boundary with the dermis. The dermis contains a dense population of spindle-shaped cells, which are fibroblasts. An arrow points to one of these cells, labeled "fibroblast". There is moderate collagen deposition, appearing as pinkish, wavy bands in the upper dermis.</p>                                                                              |
| 7 | <p>A few inflammatory cells; Medium fibroblasts; Severe collagen deposition. The immature hair follicles were observed.</p> |  <p>A histological micrograph of skin tissue. The epidermis is at the top. The dermis contains a dense population of spindle-shaped cells, which are fibroblasts. Several immature hair follicles are visible, appearing as small, circular structures with a central core. An arrow points to one of these structures, labeled "immature hair follicle". There is severe collagen deposition, appearing as thick, dense pink bands in the upper dermis.</p> |
